# Supplementary material for: New Dual Inhibitors of SARS-CoV-2 Based on Metal Complexes with Schiff-Base 4-Chloro-3-Methyl Phenyl Hydrazine: Synthesis, DFT, Antibacterial Properties and Molecular Docking Studies
Source: MDPI journal article supplement (doi:10.3390/inorganics11020063), 2023-01-29
Supplement: s1 [file s1]

**New dual inhibitors of SARS-CoV-2 based on metal complexes with schiff base 4-chloro-3-methyl phenyl hydrazine: synthesis, DFT, antibacterial properties and molecular docking studies**

**Ahmed S. M. Al-Janabi<sup>1\*</sup>, Amin O. Elzupir<sup>2</sup>, Mortaga M. Abou-Krishna<sup>3,4</sup>, T. A. Yousef<sup>3,5\*</sup>**

<sup>1</sup> *Department of Chemistry, College of Science, Tikrit University, Tikrit, Iraq.*

<sup>2</sup> *Deanship of Scientific Research, College of Science, Imam Mohammad Ibn Saud Islamic University, Riyadh, Riyadh, Saudi Arabia. \* E. mail: aoalamalhuda@imamu.edu.sa*

<sup>3</sup> *Chemistry department, Science College, Imam Mohammad Ibn Saud Islamic University, Riyadh, Riyadh, Saudi Arabia.*

<sup>4</sup> *Department of Chemistry, South Valley University, Qena, 83523, Egypt*

<sup>5</sup> *Toxic and Narcotic drug, Forensic Medicine Department, Mansoura Laboratory, Medicolegal organization, Ministry of Justice, Egypt*

Figure SI 1: IR spectrum of complex **Cmpy ligand**

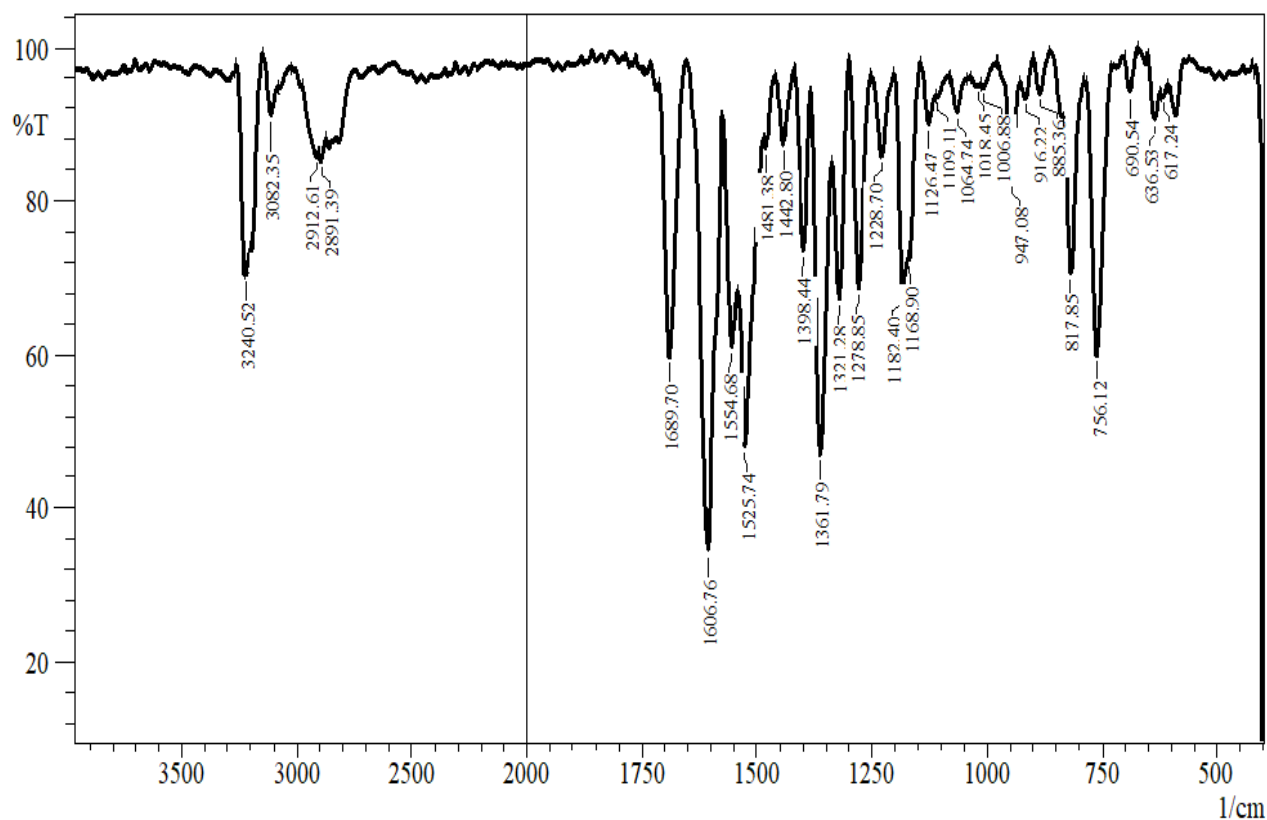

Figure SI2 : IR spectrum of complex **1**

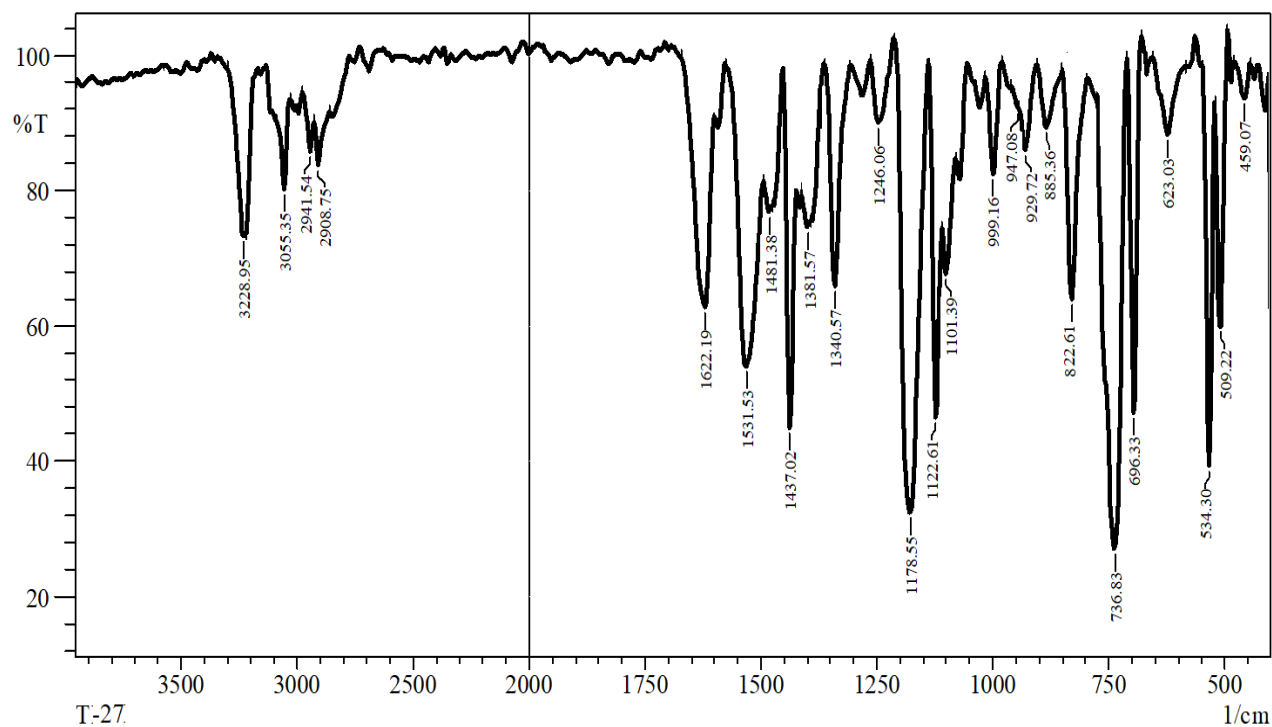

Figure SI3 : IR spectrum of complex **2**

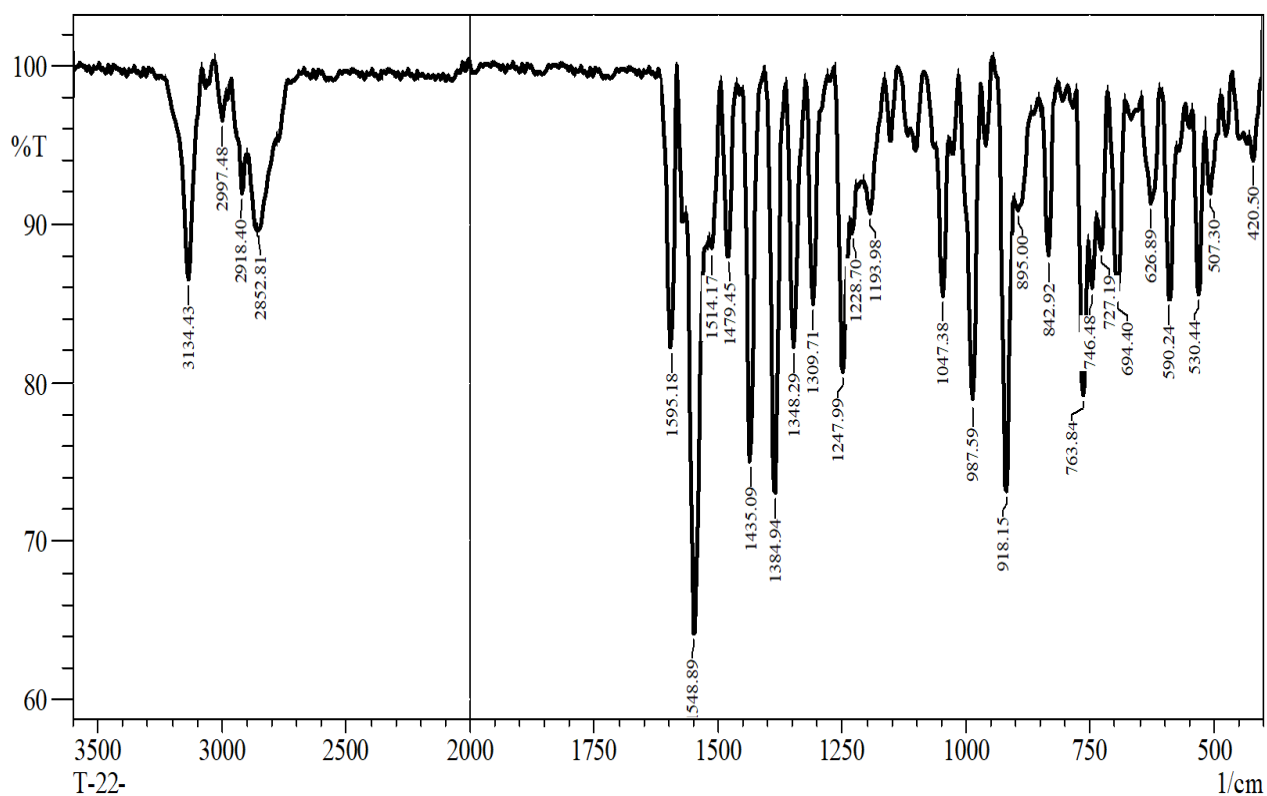

Figure SI4 : IR spectrum of complex **3**

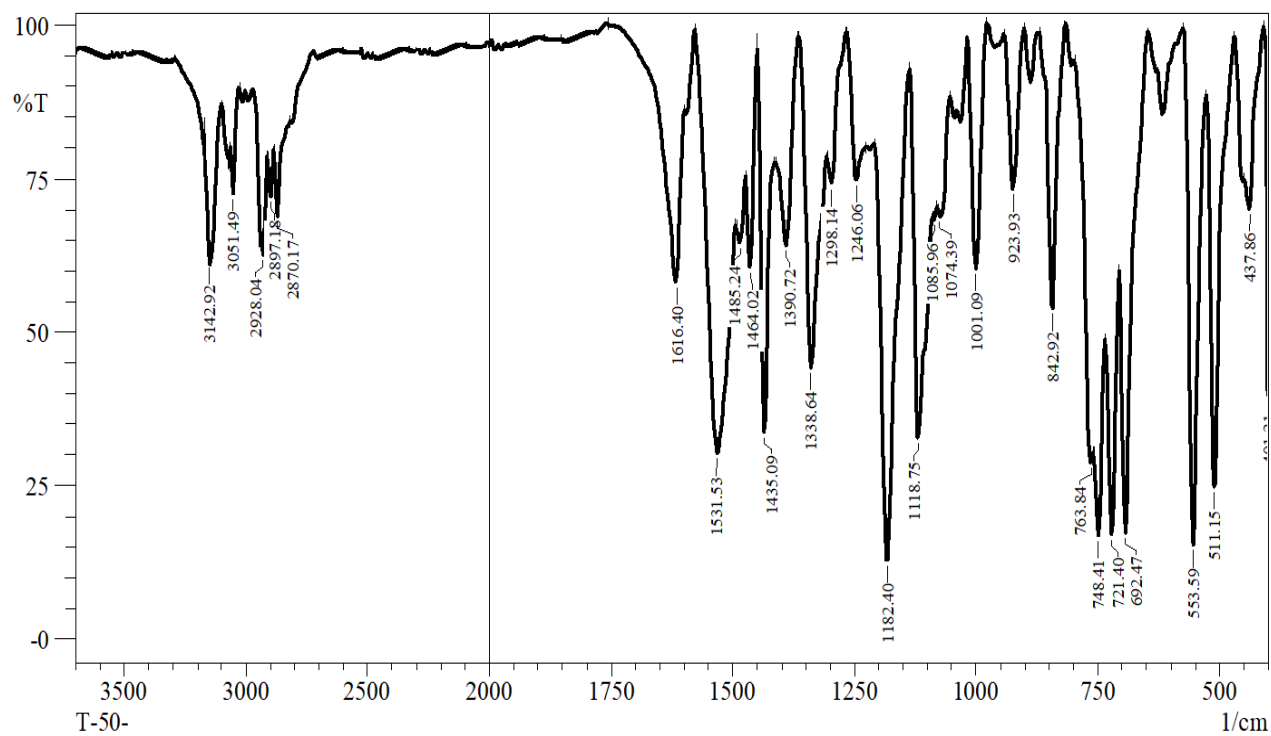

Figure SI5 : IR spectrum of complex 4

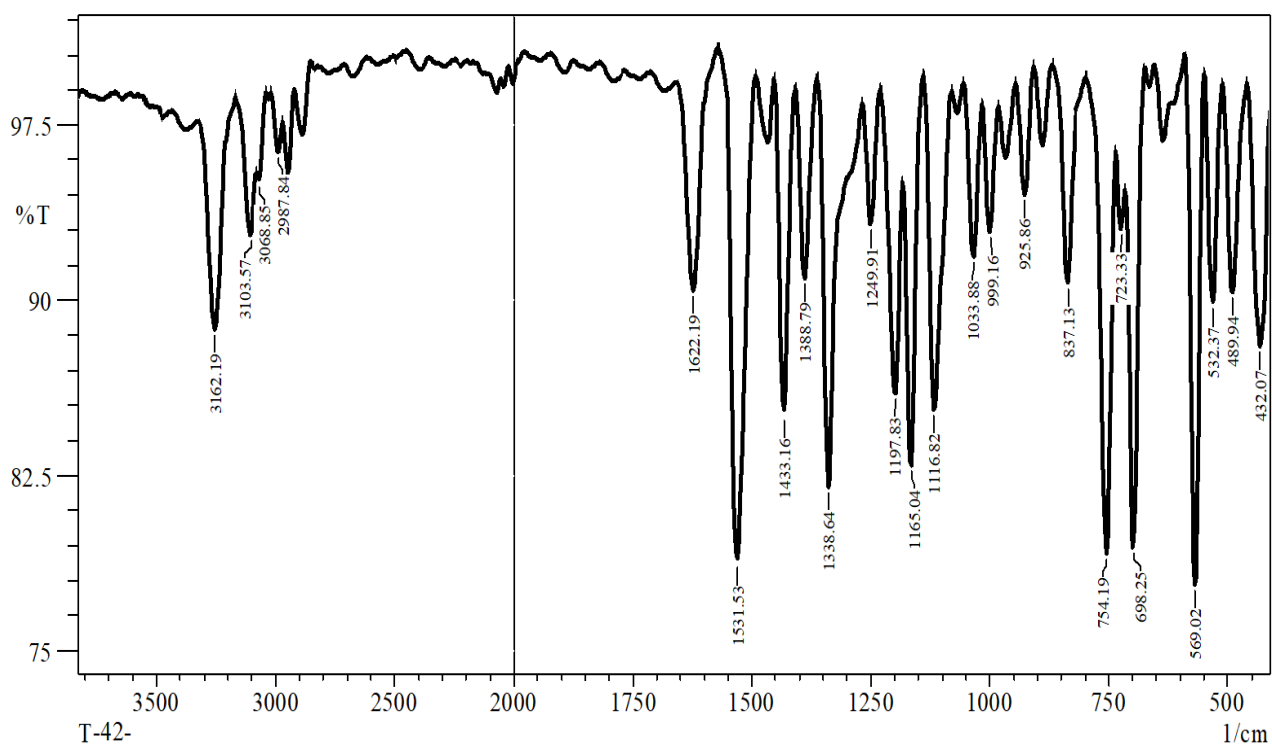

Figure SI 6 : IR spectrum of complex 5

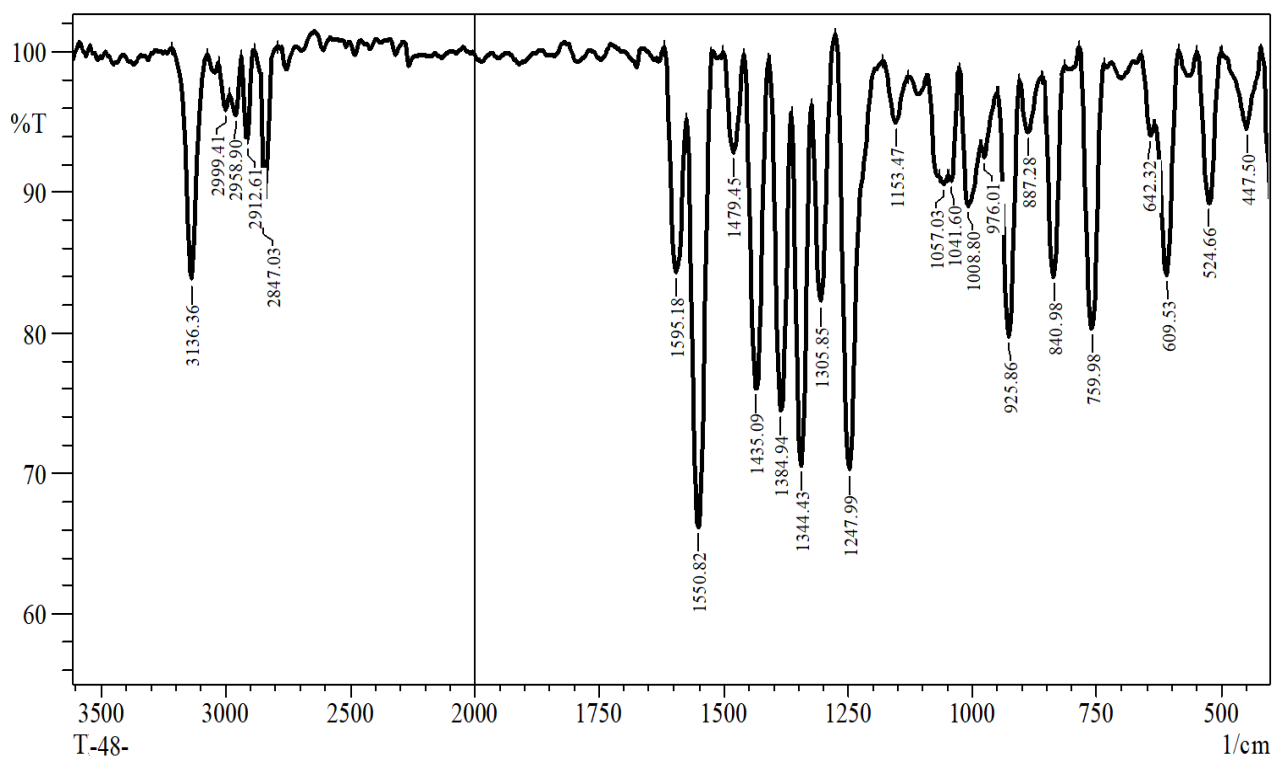

Figure SI 7 :  $^1\text{H}$  NMR spectrum of **Cmpy**

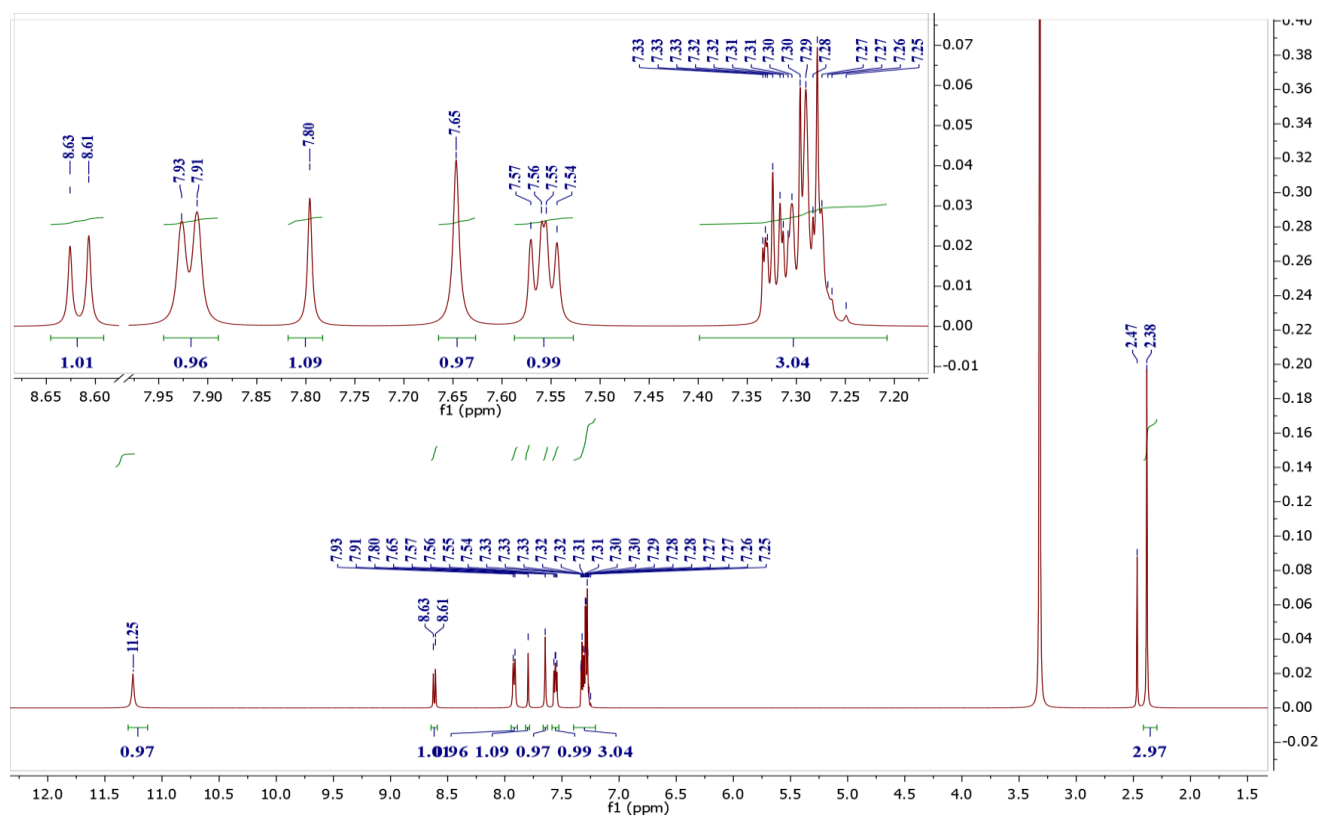

Figure SI 8 :  $^1\text{H}$  NMR spectrum of complex **1**

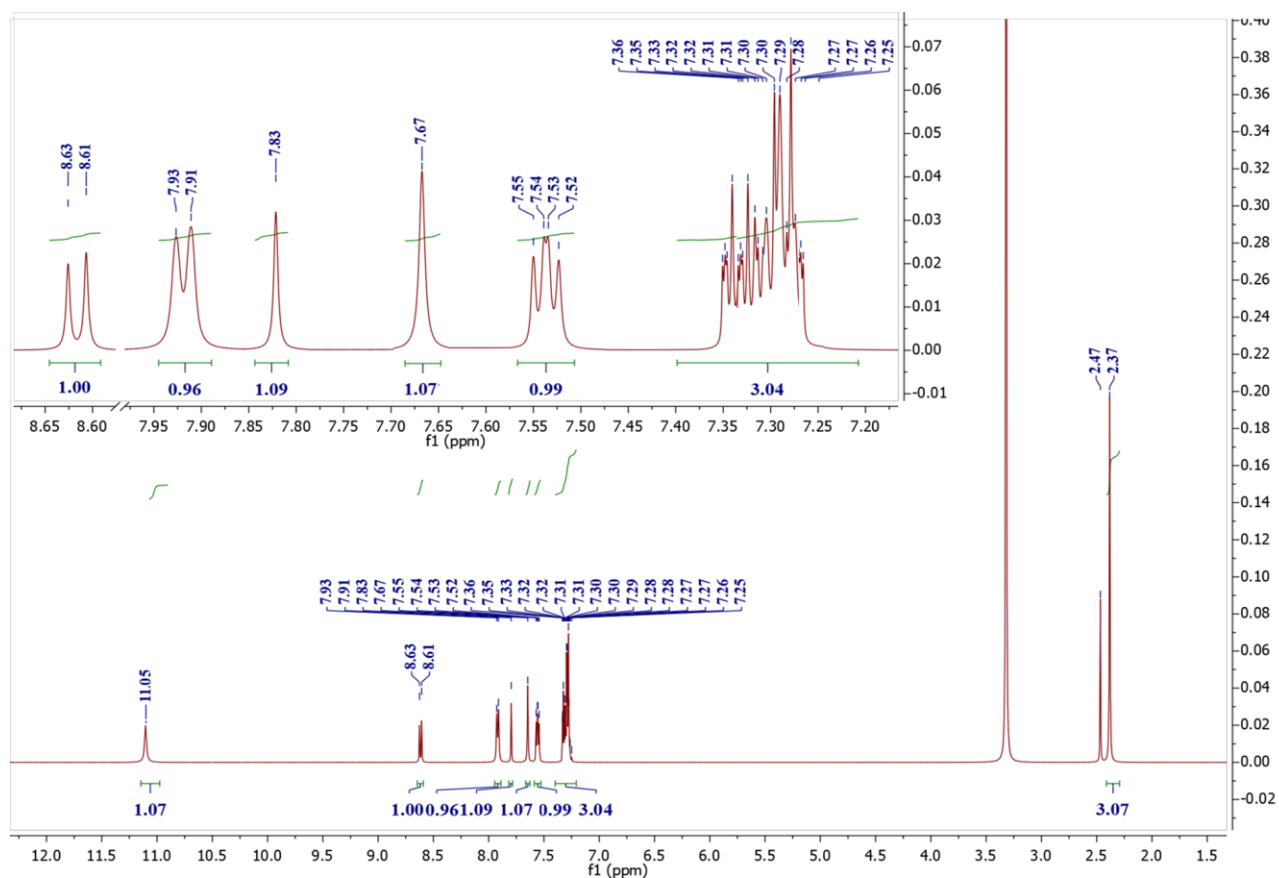

Figure SI 9 :  $^1\text{H}$  NMR spectrum of complex **2**

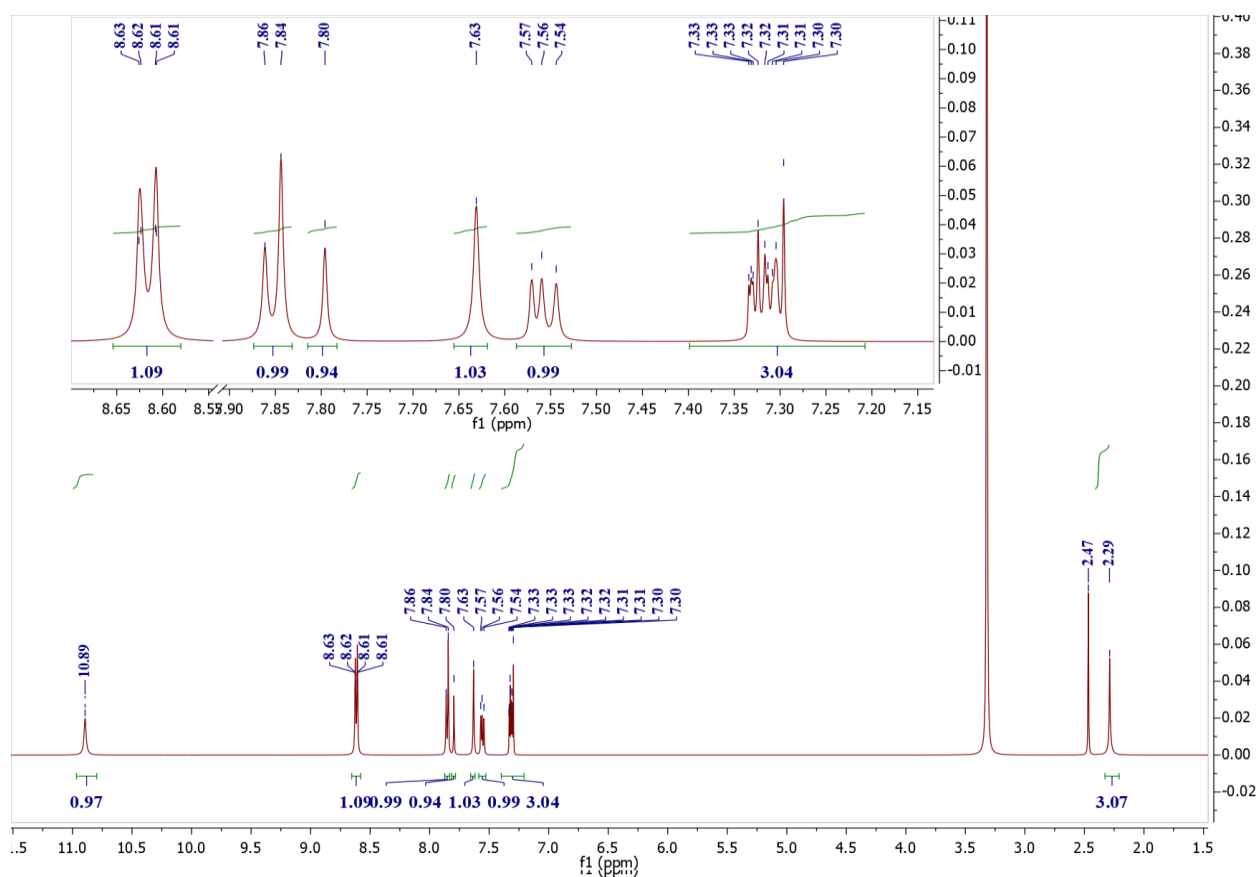

Figure SI 10 :  $^1\text{H}$  NMR spectrum of complex **3**

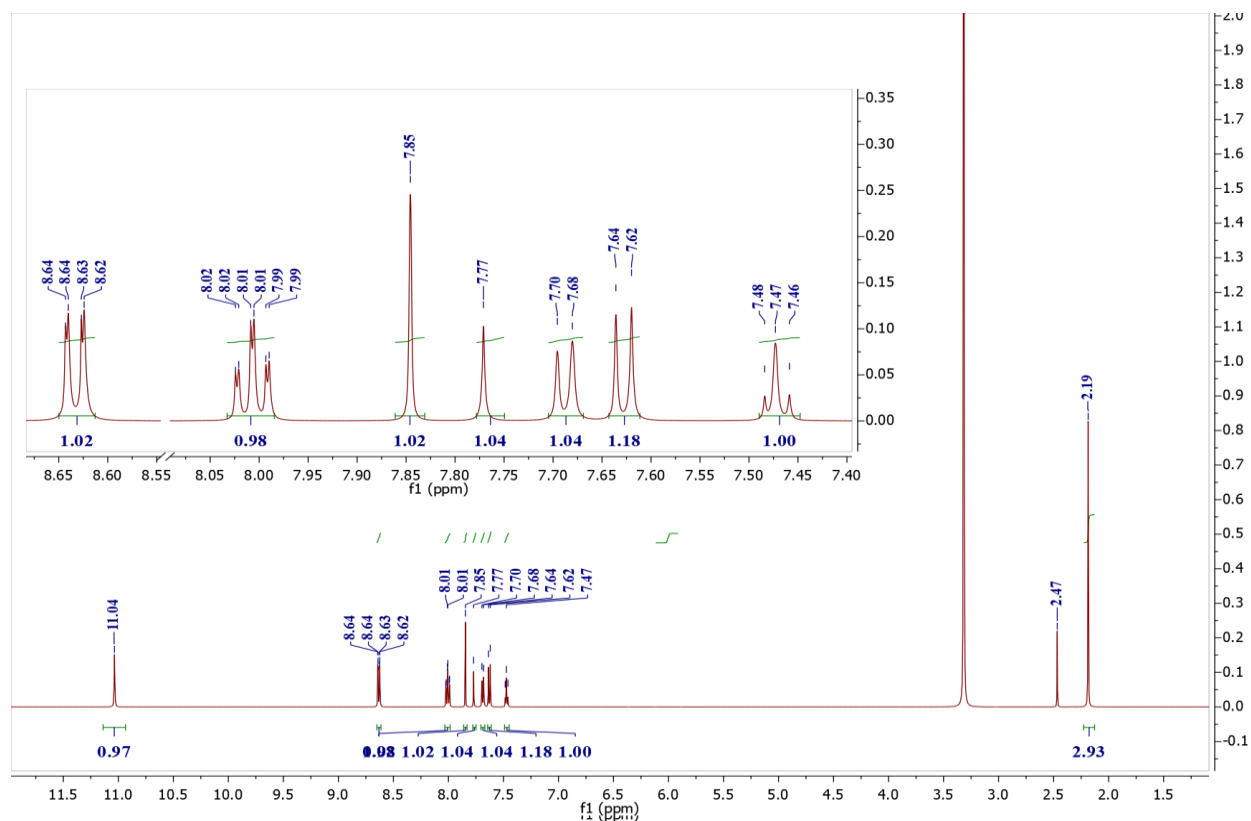

Figure SI 11 :  $^1\text{H}$  NMR spectrum of complex **4**

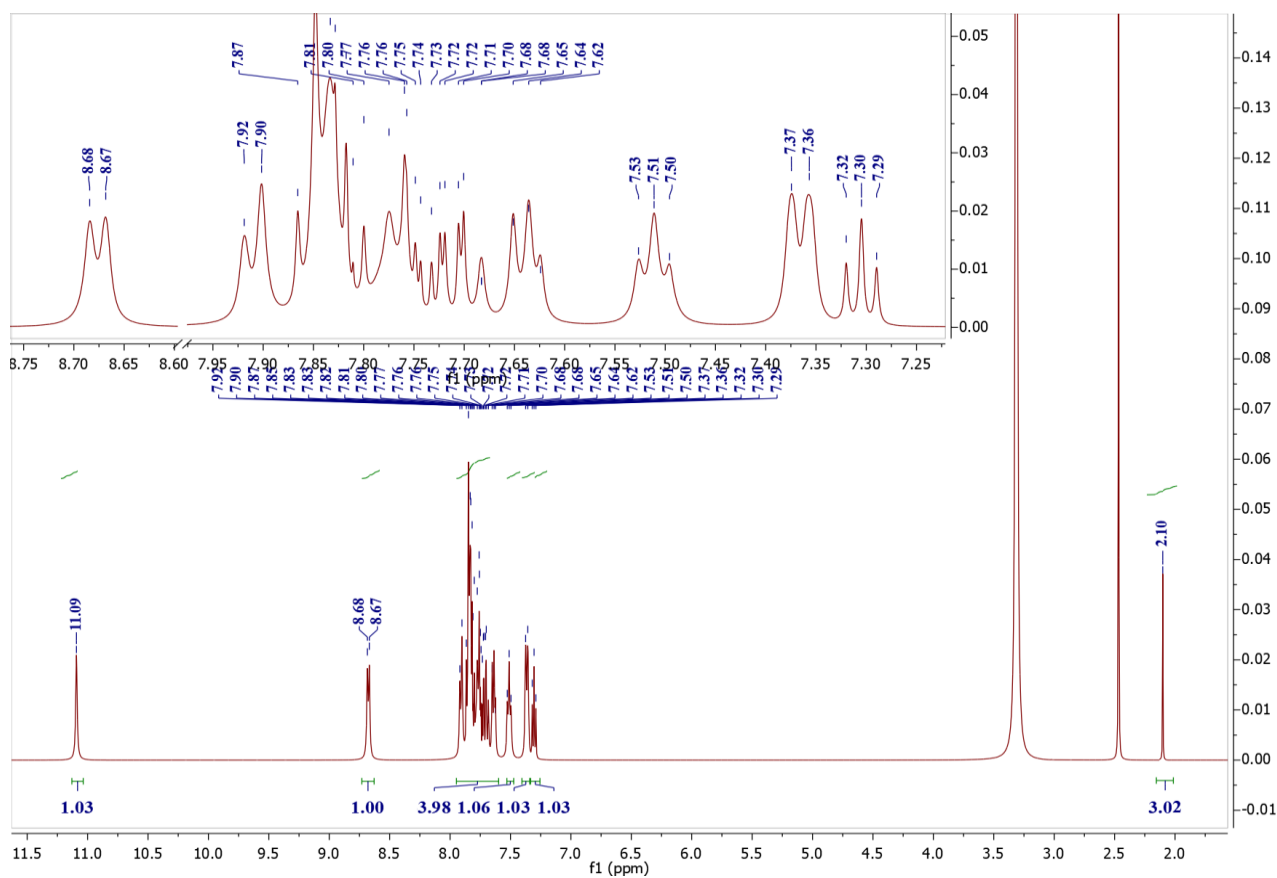

Figure SI 12 :  $^1\text{H}$  NMR spectrum of complex **5**

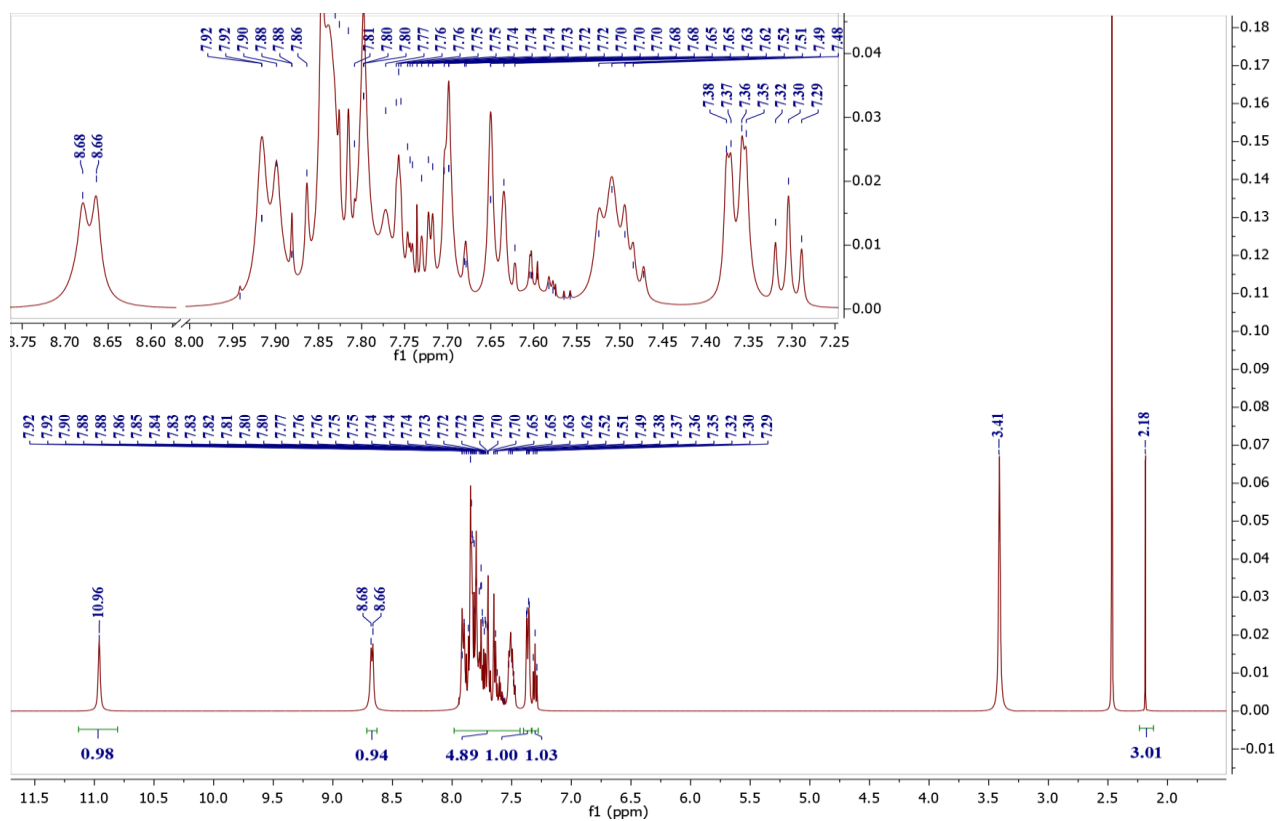

Figure SI 13 :  $^{13}\text{C}$  NMR spectrum of **Cmpy**

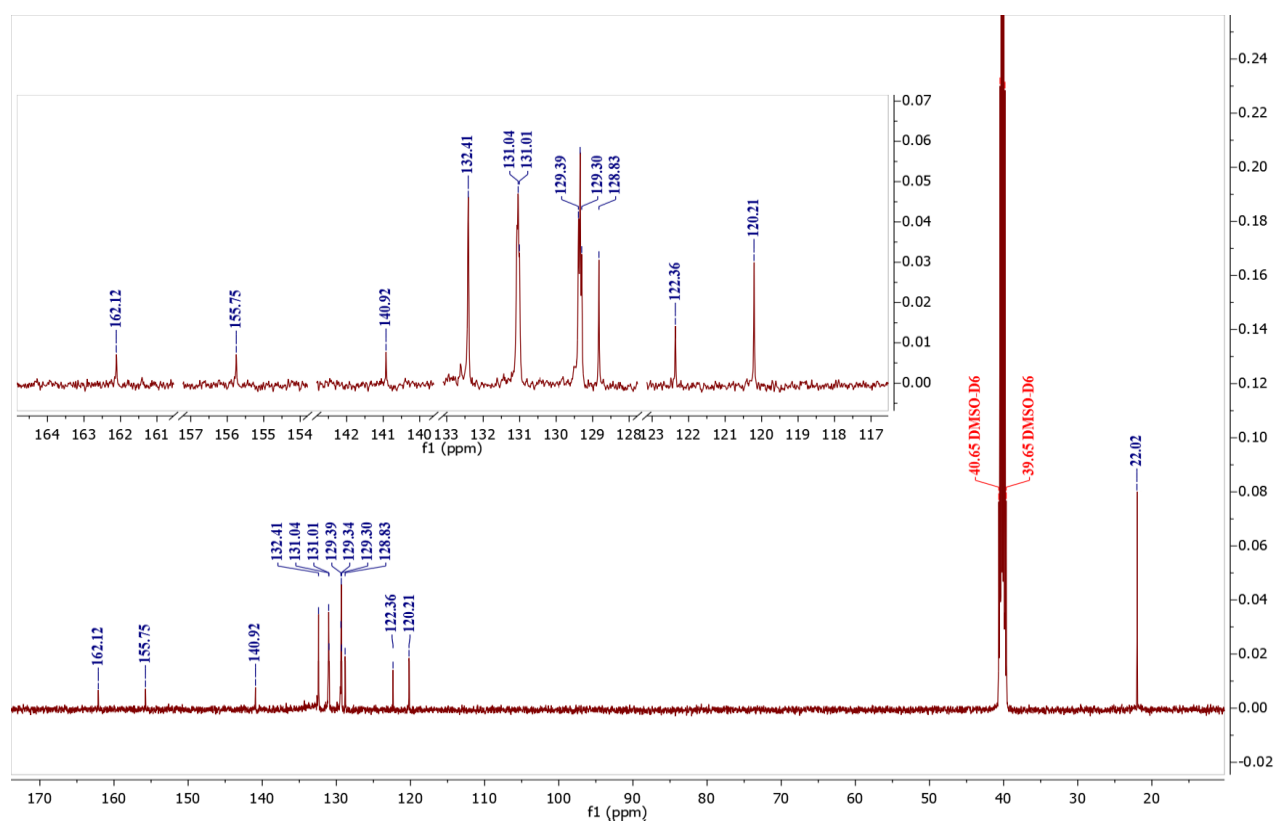

Figure SI 14 :  $^{13}\text{C}$  NMR spectrum of complex **1**

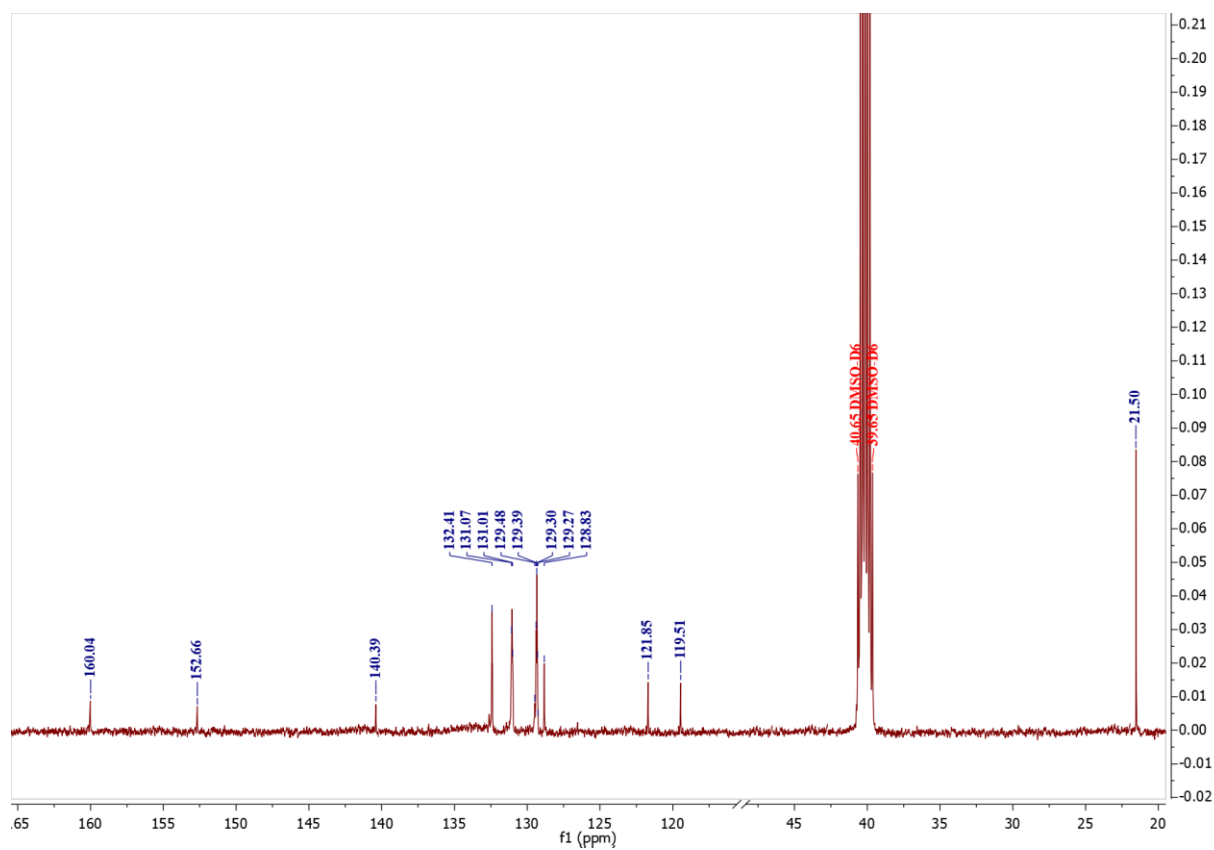



Figure SI 15 :  $^{13}\text{C}$  NMR spectrum of complex **2**

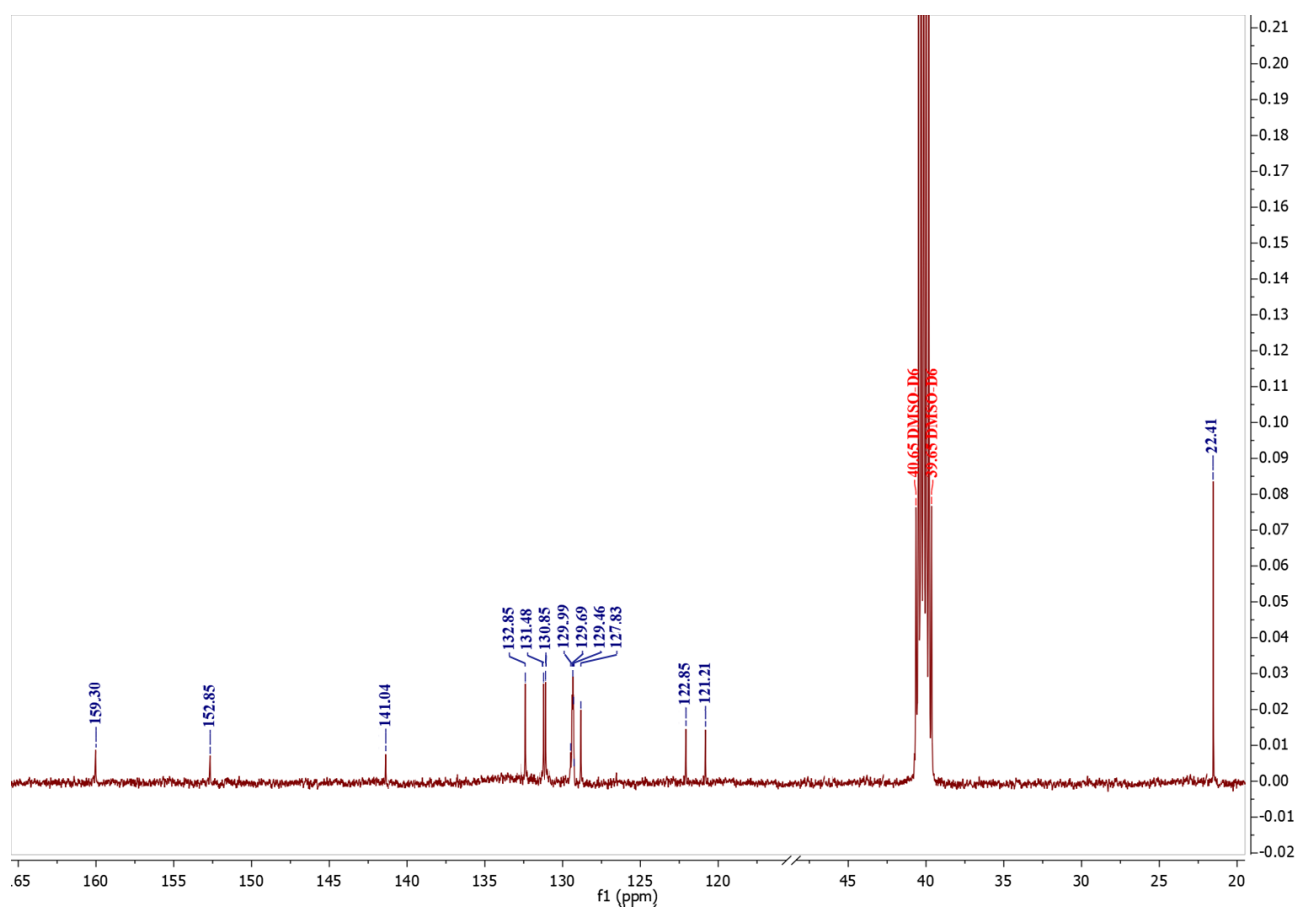

## Supplementary information

**Table SI 1.** Mulliken atomic charges of Cmpy and its complexes determined by DFT using 6-311G-based B3LYP (d, p).

| Cmpy |        | Ni complex |        | Pd complex |        | Pt complex |        | Zn complex |        | Hg complex |        |
|------|--------|------------|--------|------------|--------|------------|--------|------------|--------|------------|--------|
| Atom | Charge | Atom       | Charge | Atom       | Charge | Atom       | Charge | Atom       | Charge | Atom       | Charge |
| 1 C  | -0.46  | 1 C        | 0.08   | 1 C        | 0.04   | 1 C        | 0.09   | 1 C        | 0.08   | 1 C        | -0.07  |
| 2 C  | 0.19   | 2 C        | 0.06   | 2 C        | 0.08   | 2 C        | -0.18  | 2 C        | 0.07   | 2 C        | -0.14  |
| 3 C  | 0.06   | 3 C        | 0.07   | 3 C        | -0.08  | 3 C        | 0.23   | 3 C        | 0.06   | 3 C        | 0.33   |
| 4 N  | -0.02  | 4 N        | 0.28   | 4 N        | 0.17   | 4 N        | 0.24   | 4 N        | 0.33   | 4 N        | 0.18   |
| 5 C  | 0.01   | 5 C        | 0.44   | 5 C        | 1.35   | 5 C        | 1.49   | 5 C        | 0.36   | 5 C        | 0.92   |
| 6 C  | 0.58   | 6 C        | -0.09  | 6 C        | -0.57  | 6 C        | -0.47  | 6 C        | -0.08  | 6 C        | -0.32  |
| 7 C  | -0.59  | 7 C        | 0.07   | 7 C        | -1.79  | 7 C        | -2.22  | 7 C        | 0.10   | 7 C        | -1.37  |
| 8 N  | -0.01  | 8 N        | 0.18   | 8 N        | 0.15   | 8 N        | 0.44   | 8 N        | 0.31   | 8 N        | 0.51   |
| 9 N  | 0.45   | 9 N        | 0.05   | 9 N        | 0.19   | 9 N        | 0.26   | 9 N        | 0.04   | 9 N        | 0.23   |
| 10 C | -0.83  | 10 C       | 0.25   | 10 C       | 1.52   | 10 C       | 1.24   | 10 C       | 0.35   | 10 C       | 1.42   |
| 11 C | 0.41   | 11 C       | -0.09  | 11 C       | -0.33  | 11 C       | -0.27  | 11 C       | -0.09  | 11 C       | -0.54  |
| 12 C | -0.32  | 12 C       | 0.04   | 12 C       | -1.07  | 12 C       | -1.14  | 12 C       | 0.01   | 12 C       | -1.16  |
| 13 C | -0.15  | 13 C       | -0.27  | 13 C       | -0.20  | 13 C       | -0.13  | 13 C       | -0.26  | 13 C       | -0.22  |
| 14 C | 0.61   | 14 C       | 0.52   | 14 C       | 0.59   | 14 C       | 0.83   | 14 C       | 0.53   | 14 C       | 0.78   |
| 15 C | -0.14  | 15 C       | -0.219 | 15 C       | -0.96  | 15 C       | -1.17  | 15 C       | -0.25  | 15 C       | -1.07  |
| 16 C | -0.33  | 16 C       | -0.04  | 16 C       | -0.12  | 16 C       | 0.00   | 16 C       | -0.04  | 16 C       | -0.06  |
| 17 C | 0.49   | 17 C       | 0.03   | 17 C       | 0.82   | 17 C       | 0.99   | 17 C       | -0.03  | 17 C       | 0.97   |
|      |        | 18 Ni      | 0.19   | 18 Pd      | 0.04   | 18 Pt      | -0.62  | 18 Zn      | 0.65   | 18 Hg      | -1.06  |
|      |        | 19 Cl      | -0.28  | 19 Cl      | -0.02  | 19 Cl      | -0.02  | 19 Cl      | -0.44  | 19 Cl      | -0.41  |
|      |        | 20 Cl      | -0.28  | 20 Cl      | -0.21  | 20 Cl      | -0.34  | 20 Cl      | -0.44  | 20 Cl      | -0.61  |

**Table SI2.** Physiochemical properties of synthesized compounds.

|                                 | L                          | Ni                         | Pd                         | Pt                         | Zn                         | Hg                         |
|---------------------------------|----------------------------|----------------------------|----------------------------|----------------------------|----------------------------|----------------------------|
| <b>Molecular weight (g/mol)</b> | <b>245.71</b>              | <b>375.31</b>              | <b>423.03</b>              | <b>511.69</b>              | <b>381.99</b>              | <b>517.20</b>              |
| <b>Num. heavy atoms</b>         | <b>17</b>                  | <b>20</b>                  | <b>20</b>                  | <b>20</b>                  | <b>20</b>                  | <b>20</b>                  |
| <b>Num. arom. heavy atoms</b>   | <b>12</b>                  | <b>12</b>                  | <b>12</b>                  | <b>12</b>                  | <b>12</b>                  | <b>12</b>                  |
| <b>Fraction Csp3</b>            | <b>0.08</b>                | <b>0.08</b>                | <b>0.08</b>                | <b>0.08</b>                | <b>0.08</b>                | <b>0.08</b>                |
| <b>Num. rotatable bonds</b>     | <b>3</b>                   | <b>2</b>                   | <b>2</b>                   | <b>2</b>                   | <b>2</b>                   | <b>2</b>                   |
| <b>Num. H-bond acceptors</b>    | <b>2</b>                   | <b>0</b>                   | <b>0</b>                   | <b>0</b>                   | <b>0</b>                   | <b>0</b>                   |
| <b>Num. H-bond donors</b>       | <b>1</b>                   | <b>1</b>                   | <b>1</b>                   | <b>1</b>                   | <b>1</b>                   | <b>1</b>                   |
| <b>Molar Refractivity</b>       | <b>71.69</b>               | <b>86.72</b>               | <b>86.72</b>               | <b>86.72</b>               | <b>86.72</b>               | <b>86.72</b>               |
| <b>TPSA</b>                     | <b>37.28 Å<sup>2</sup></b> | <b>32.10 Å<sup>2</sup></b> |

TPSA: Topological polar surface area.

**Table SI3.** Lipophilicity and water solubility of synthesized compounds.

|                              | L                                                                 | Ni                                                                | Pd                                                                | Pt                                                    | Zn                                                    | Hg                                                                |
|------------------------------|-------------------------------------------------------------------|-------------------------------------------------------------------|-------------------------------------------------------------------|-------------------------------------------------------|-------------------------------------------------------|-------------------------------------------------------------------|
| <b>Log Po/w (iLOGP)</b>      | <b>2.10</b>                                                       | <b>0.00</b>                                                       | <b>0.00</b>                                                       | <b>0.00</b>                                           | <b>0.00</b>                                           | <b>0.00</b>                                                       |
| <b>Log Po/w (XLOGP3)</b>     | <b>3.79</b>                                                       | <b>5.41</b>                                                       | <b>5.41</b>                                                       | <b>5.41</b>                                           | <b>5.41</b>                                           | <b>5.41</b>                                                       |
| <b>Log Po/w (WLOGP)</b>      | <b>3.30</b>                                                       | <b>2.98</b>                                                       | <b>2.98</b>                                                       | <b>2.98</b>                                           | <b>2.98</b>                                           | <b>2.98</b>                                                       |
| <b>Log Po/w (MLOGP)</b>      | <b>2.41</b>                                                       | <b>2.91</b>                                                       | <b>2.91</b>                                                       | <b>2.91</b>                                           | <b>2.91</b>                                           | <b>2.91</b>                                                       |
| <b>Log Po/w (SILICOS-IT)</b> | <b>3.63</b>                                                       | <b>1.21</b>                                                       | <b>1.50</b>                                                       | <b>2.05</b>                                           | <b>1.25</b>                                           | <b>2.08</b>                                                       |
| <b>Consensus Log Po/w</b>    | <b>3.05</b>                                                       | <b>2.50</b>                                                       | <b>2.56</b>                                                       | <b>2.67</b>                                           | <b>2.51</b>                                           | <b>2.68</b>                                                       |
| <b>Log S (ESOL)</b>          | <b>-4.08</b>                                                      | <b>-5.89</b>                                                      | <b>-6.18</b>                                                      | <b>-6.73</b>                                          | <b>-5.93</b>                                          | <b>-6.77</b>                                                      |
| <b>Solubility</b>            | <b>2.07x10<sup>-2</sup> mg/ml;<br/>8.41x10<sup>-5</sup> mol/l</b> | <b>4.87x10<sup>-4</sup> mg/ml;<br/>1.30x10<sup>-6</sup> mol/l</b> | <b>2.78x10<sup>-4</sup> mg/ml;<br/>6.56x10<sup>-7</sup> mol/l</b> | <b>9.47e-05 mg/ml;<br/>1.85x10<sup>-7</sup> mol/l</b> | <b>4.50e-04 mg/ml;<br/>1.18x10<sup>-6</sup> mol/l</b> | <b>8.85x10<sup>-5</sup> mg/ml;<br/>1.71x10<sup>-7</sup> mol/l</b> |
| <b>Class</b>                 | <b>Moderately soluble</b>                                         | <b>Moderately soluble</b>                                         | <b>Poorly soluble</b>                                             | <b>Poorly soluble</b>                                 | <b>Moderately soluble</b>                             | <b>Poorly soluble</b>                                             |
| <b>Log S (Ali)</b>           | <b>-4.27</b>                                                      | <b>-5.84</b>                                                      | <b>-5.84</b>                                                      | <b>-5.84</b>                                          | <b>-5.84</b>                                          | <b>-5.84</b>                                                      |
| <b>Solubility</b>            | <b>1.33e-02 mg/ml;<br/>5.41e-05 mol/l</b>                         | <b>5.43e-04 mg/ml;<br/>1.45e-06 mol/l</b>                         | <b>6.13e-04 mg/ml;<br/>1.45e-06 mol/l</b>                         | <b>7.41e-04 mg/ml;<br/>1.45e-06 mol/l</b>             | <b>5.53e-04 mg/ml;<br/>1.45e-06 mol/l</b>             | <b>7.49e-04 mg/ml;<br/>1.45e-06 mol/l</b>                         |
| <b>Class</b>                 | <b>Moderately soluble</b>                                         | <b>Moderately soluble</b>                                         | <b>Moderately soluble</b>                                         | <b>Moderately soluble</b>                             | <b>Moderately soluble</b>                             | <b>Moderately soluble</b>                                         |
| <b>Log S (SILICOS-IT)</b>    | <b>-5.70</b>                                                      | <b>-6.25</b>                                                      | <b>-6.37</b>                                                      | <b>-6.58</b>                                          | <b>-6.27</b>                                          | <b>-6.60</b>                                                      |
| <b>Solubility</b>            | <b>4.95e-04 mg/ml;<br/>2.01e-06 mol/l</b>                         | <b>2.12e-04 mg/ml;<br/>5.65e-07 mol/l</b>                         | <b>1.80e-04 mg/ml;<br/>4.25e-07 mol/l</b>                         | <b>1.33e-04 mg/ml;<br/>2.60e-07 mol/l</b>             | <b>2.07e-04 mg/ml;<br/>5.42e-07 mol/l</b>             | <b>1.31e-04 mg/ml;<br/>2.52e-07 mol/l</b>                         |
| <b>Class</b>                 | <b>Moderately soluble</b>                                         | <b>Poorly soluble</b>                                             | <b>Poorly soluble</b>                                             | <b>Poorly soluble</b>                                 | <b>Poorly soluble</b>                                 | <b>Poorly soluble</b>                                             |

**Table SI4.** Pharmacokinetics and druglikeness of synthesized compounds.

|                                 | <b>L</b>                 | <b>Ni</b>                | <b>Pd</b>                | <b>Pt</b>               | <b>Zn</b>                | <b>Hg</b>               |
|---------------------------------|--------------------------|--------------------------|--------------------------|-------------------------|--------------------------|-------------------------|
| <b>GI absorption</b>            | <b>High</b>              | <b>High</b>              | <b>High</b>              | <b>High</b>             | <b>High</b>              | <b>High</b>             |
| <b>BBB permeant</b>             | <b>Yes</b>               | <b>Yes</b>               | <b>Yes</b>               | <b>Yes</b>              | <b>Yes</b>               | <b>Yes</b>              |
| <b>P-gp substrate</b>           | <b>No</b>                | <b>Yes</b>               | <b>Yes</b>               | <b>Yes</b>              | <b>Yes</b>               | <b>Yes</b>              |
| <b>CYP1A2 inhibitor</b>         | <b>Yes</b>               | <b>Yes</b>               | <b>Yes</b>               | <b>Yes</b>              | <b>Yes</b>               | <b>Yes</b>              |
| <b>CYP2C19 inhibitor</b>        | <b>Yes</b>               | <b>Yes</b>               | <b>Yes</b>               | <b>No; 1 violation</b>  | <b>Yes</b>               | <b>Yes</b>              |
| <b>CYP2C9 inhibitor</b>         | <b>No</b>                | <b>No</b>                | <b>No</b>                | <b>No</b>               | <b>No</b>                | <b>No</b>               |
| <b>CYP2D6 inhibitor</b>         | <b>No</b>                | <b>Yes</b>               | <b>Yes</b>               | <b>Yes</b>              | <b>Yes</b>               | <b>Yes</b>              |
| <b>CYP3A4 inhibitor</b>         | <b>No</b>                | <b>Yes</b>               | <b>Yes</b>               | <b>Yes</b>              | <b>No</b>                | <b>No</b>               |
| <b>Log Kp (skin permeation)</b> | <b>-5.11 cm/s</b>        | <b>-4.75 cm/s</b>        | <b>-5.04 cm/s</b>        | <b>-5.58 cm/s</b>       | <b>-4.79 cm/s</b>        | <b>-5.61 cm/s</b>       |
| <b>Lipinski</b>                 | <b>Yes; 0 violations</b> | <b>Yes; 0 violations</b> | <b>Yes; 0 violations</b> | <b>Yes; 1 violation</b> | <b>Yes; 0 violations</b> | <b>Yes; 1 violation</b> |
| <b>Ghose</b>                    | <b>Yes</b>               | <b>Yes</b>               | <b>Yes</b>               | <b>No; 1 violation</b>  | <b>Yes</b>               | <b>No; 1 violation</b>  |
| <b>Veber</b>                    | <b>Yes</b>               | <b>Yes</b>               | <b>Yes</b>               | <b>Yes</b>              | <b>Yes</b>               | <b>Yes</b>              |
| <b>Egan</b>                     | <b>Yes</b>               | <b>Yes</b>               | <b>Yes</b>               | <b>Yes</b>              | <b>Yes</b>               | <b>Yes</b>              |
| <b>Muegge</b>                   | <b>Yes</b>               | <b>No; 1 violation</b>   | <b>No; 1 violation</b>   | <b>No; 1 violation</b>  | <b>No; 1 violation</b>   | <b>No; 1 violation</b>  |
| <b>Bioavailability Score</b>    | <b>0.55</b>              | <b>0.55</b>              | <b>0.55</b>              | <b>0.55</b>             | <b>0.55</b>              | <b>0.55</b>             |
